# Supplementary material for: IDH mutation and MGMT promoter methylation in glioblastoma: results of a prospective registry
Source: PubMed Central journal article supplement (PMC4747376; doi:10.18632/oncotarget.5683), 2015-10-12
Supplement: oncotarget-06-40896-s001.pdf [file oncotarget-06-40896-s001.pdf]

SUPPLEMENTARY FIGURES AND TABLES

A

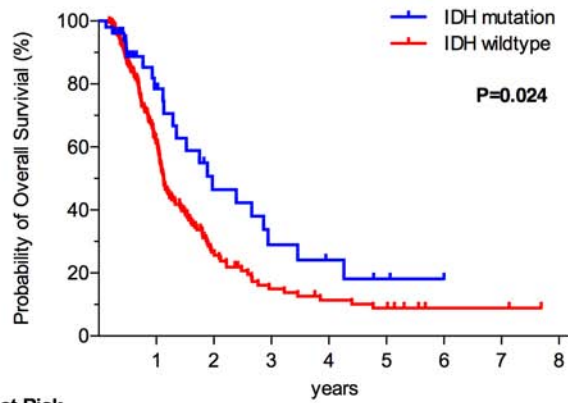

No. at Risk

|          |     |    |    |    |   |   |   |   |   |
|----------|-----|----|----|----|---|---|---|---|---|
| Mutation | 52  | 23 | 12 | 6  | 4 | 2 | 1 | 0 | 0 |
| Wildtype | 213 | 96 | 24 | 12 | 9 | 7 | 2 | 2 | 0 |

B

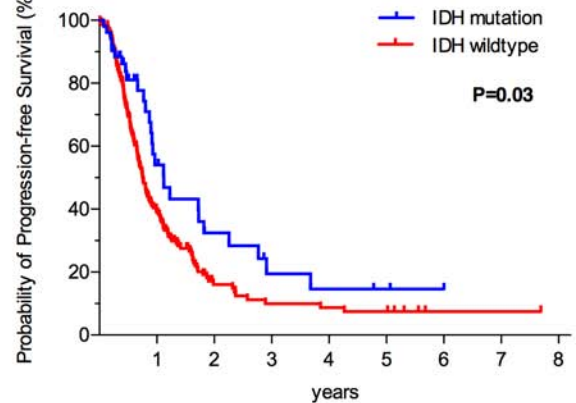

|          |     |    |    |    |   |   |   |   |   |
|----------|-----|----|----|----|---|---|---|---|---|
| Mutation | 52  | 23 | 12 | 6  | 4 | 2 | 1 | 0 | 0 |
| Wildtype | 213 | 96 | 24 | 12 | 9 | 7 | 2 | 2 | 0 |

C

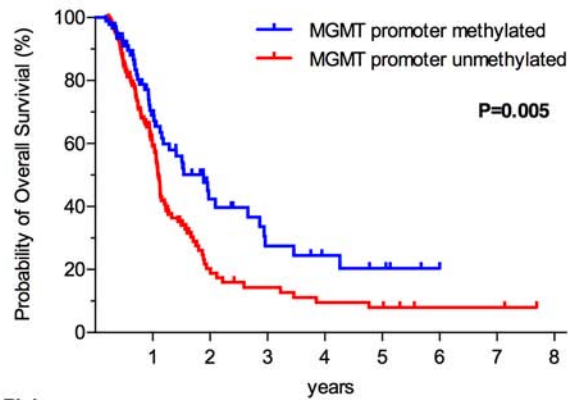

No. at Risk

|              |     |    |    |   |   |   |   |   |   |
|--------------|-----|----|----|---|---|---|---|---|---|
| Methylated   | 92  | 42 | 17 | 9 | 6 | 4 | 1 | 0 | 0 |
| Unmethylated | 146 | 61 | 14 | 9 | 6 | 5 | 2 | 2 | 0 |

D

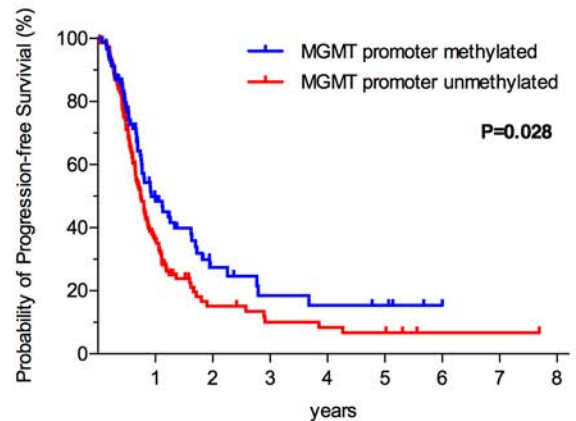

|              |     |    |    |   |   |   |   |   |   |
|--------------|-----|----|----|---|---|---|---|---|---|
| Methylated   | 92  | 34 | 10 | 6 | 5 | 4 | 1 | 0 | 0 |
| Unmethylated | 146 | 38 | 10 | 6 | 5 | 4 | 1 | 1 | 0 |

**Supplementary Figure S1: Kaplan–Meier curves showing that IDH mutation was prognostic of longer overall survival A. and progression-free survival B. among the GBM patients. Meanwhile, MGMT promoter methylation was also a prognostic factor for both longer overall survival C. and progression-free survival D. among GBM patients.**

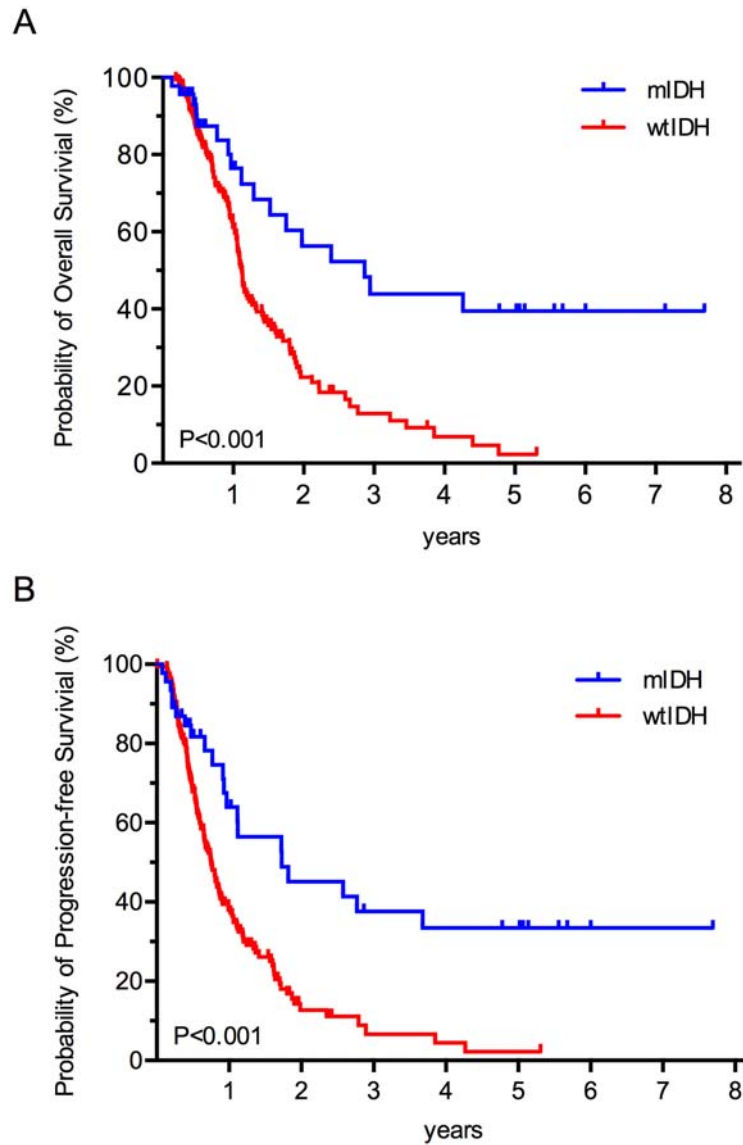

**Supplementary Figure S2: A.** The Kaplan–Meier estimates for overall survival indicated that the group of GBM patients with IDH1 mutation who underwent RT plus TMZ treatment exhibited a longer survival time than the patients with IDH mutation that received RT only treatment. **B.** The GBM patients with IDH wild type who underwent RT plus TMZ treatment also exhibited a better prognosis than those with IDH1 wild type receiving RT only.

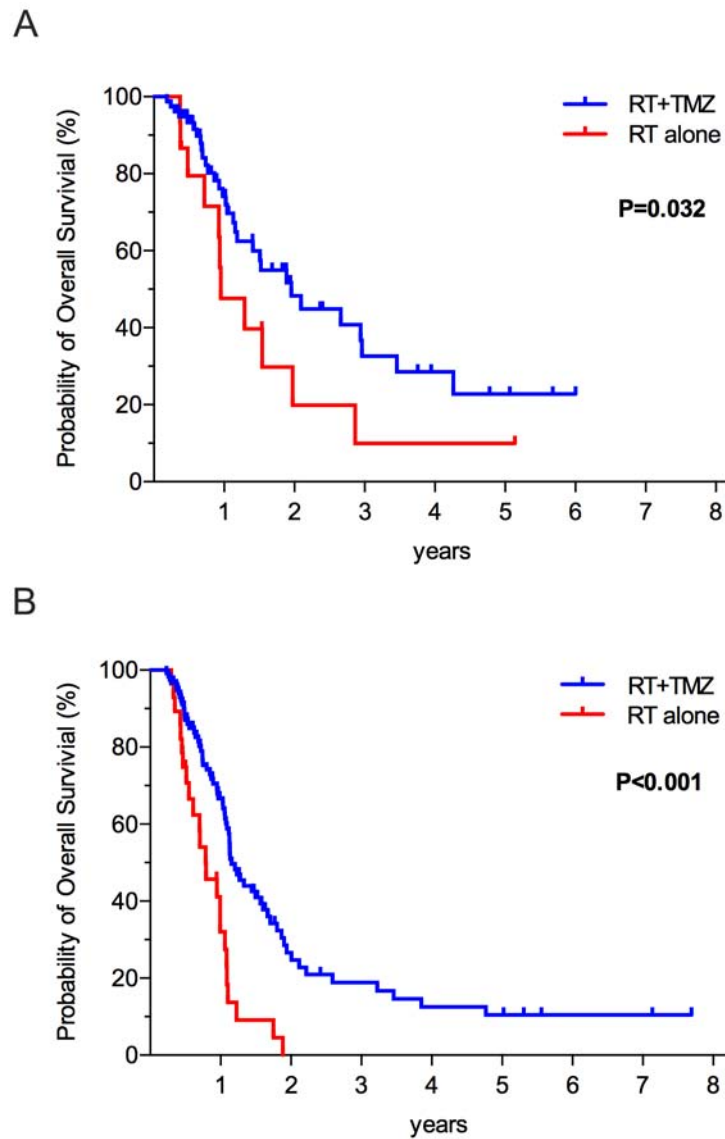

**Supplementary Figure S3: A.** The Kaplan–Meier estimates for overall survival indicated that the group of GBM patients with MGMT promoter methylation who underwent RT plus TMZ treatment exhibited a longer survival time than the patients with MGMT promoter methylation that received RT only treatment. **B.** The GBM patients with unmethylated MGMT promoters who underwent RT plus TMZ treatment also exhibited a better prognosis than those with unmethylated MGMT promoters receiving RT only.

**Supplementary Table S1: Survival According to Treatment**

| Treatment group    | Glioblastoma |              |      |
|--------------------|--------------|--------------|------|
|                    | Total        | RT/TMZ → TMZ | RT   |
| No. of patients    | 274          | 229          | 45   |
| Median OS (month)  | 14.5         | 17.8         | 11.4 |
| at 6-month (%)     | 85           | 89           | 70   |
| at 1-year (%)      | 65           | 69           | 34   |
| at 3-year (%)      | 17           | 22           | 3    |
| at 5-year (%)      | 10           | 12           | 3    |
| Median PFS (month) | 9.8          | 10.7         | 6.5  |
| at 6-month (%)     | 67           | 71           | 47   |
| at 1-year (%)      | 39           | 43           | 20   |
| at 3-year (%)      | 11           | 13           | 4    |
| at 5-year (%)      | 8            | 9            | 4    |

**Supplementary Table S2: Survival According to IDH, MGMT and Treatment**

| MGMT                               | IDH                 | Treatment group | No. of patients | Median OS (days) | P value | Median PFS (days) | P value |
|------------------------------------|---------------------|-----------------|-----------------|------------------|---------|-------------------|---------|
| <b>MGMT promoter methylation</b>   | <b>IDH mutation</b> | <b>RT+TMZ</b>   | 26              | 1074             | 0.082   | 824               | 0.065   |
|                                    |                     | <b>RT alone</b> | 6               | 720              |         | 409               |         |
|                                    | <b>IDH wildtype</b> | <b>RT+TMZ</b>   | 46              | 514              | 0.04    | 296               | 0.061   |
|                                    |                     | <b>RT alone</b> | 8               | 338              |         | 157               |         |
| <b>MGMT promoter unmethylation</b> | <b>IDH mutation</b> | <b>RT+TMZ</b>   | 14              | 1080             | NA      | 365               | NA      |
|                                    |                     | <b>RT alone</b> | 1               | NA               |         | NA                |         |
|                                    | <b>IDH wildtype</b> | <b>RT+TMZ</b>   | 101             | 449              | <0.001  | 292               | 0.001   |
|                                    |                     | <b>RT alone</b> | 27              | 287              |         | 239               |         |
